# Supplementary material
Source: publisher figshare collection journal article supplement (https://karger.figshare.com/articles/dataset/_/5455138)
Supplement: Supplementary file 1 [file 1]

Supplemental data Figure 1

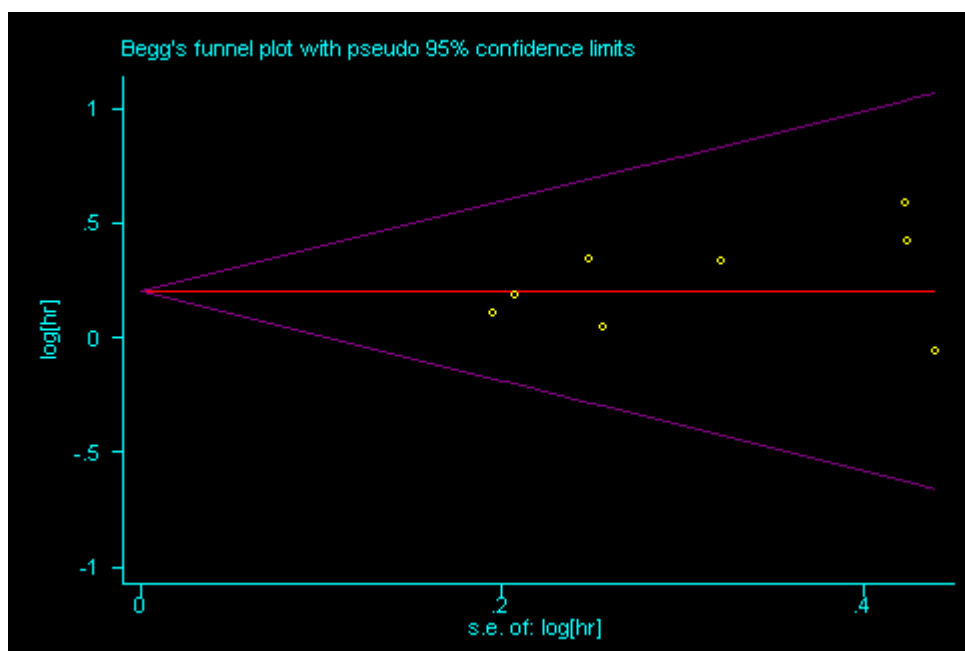

Publication bias by Begg's test. ( $p=0.711$ )

Supplemental data Figure 2

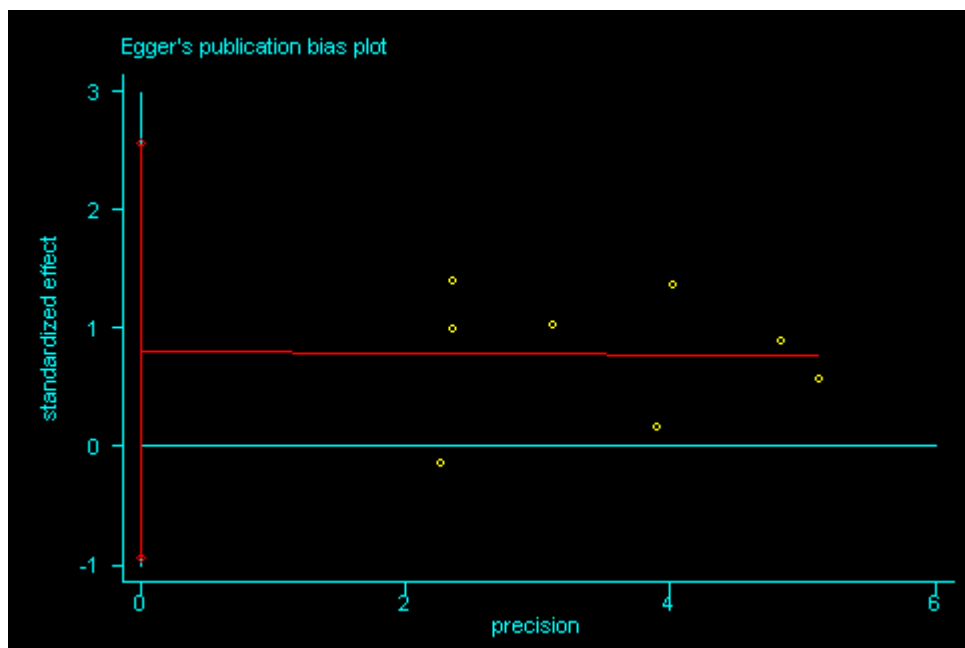

Publication bias by Egger's test. ( $p=0.303$ )
